# Supplementary material for: Nitrogen isotopes in herbaria document historical nitrogen sewage pollution in the Mersey Estuary, England
Source: Royal Society of Chemistry journal article supplement (doi:10.1039/d4va00015c), 2024-01-01
Supplement: d4va00015c1.xlsx [file d4va00015c1.xlsx]

## Sheet: River Mersey Herbaria Data
Year	Species	Location	d15Nmacroalgae ‰ (AIR)	World Museums Liverpool Acession Number
1821	Enteromorpha compressa	Liverpool	13.391	15.2.77.9860
1821	Enteromorpha compressa	Liverpool	5.10013	15.2.77.9859
1822	Polysiphonia elongata	Liverpool	6.41916	15.2.77.9994
1823	Polysiphonia elongata	Liverpool	8.81819	15.2.77.9992
1823	Ceramium rubrum	Liverpool	7.43917	15.2.77.9930C
1824	Ceramium rubrum	Liverpool	12.6986	15.2.77.9930B
1830	Dictyota dichotoma	Liverpool	7.84835	15.2.77.9878
1831	Ectocarpus amphibius	Liverpool	5.23489	15.2.77.9880
1834	Pylaiella littoralis	Liverpool	6.24506	15.2.77.9885
1842	Cladophora sericea	Liverpool	8.69032	15.2.77.9856
1844	Ulva lactuca	Liverpool	11.0815	15.2.77.9862
1845	Halidrys siliquosa	Liverpool	7.54736	15.2.77.9896
1845	Pelvetia canaliculata	Liverpool	4.91029	15.2.77.9913
1849	Enteromorpha intestinalis	Bootle	21.4763	1974.38.38697
1850	Ulva linza	Bootle	7.14	1974.38.38698
1851	Polysiphonia elongata	Liverpool	6.41227	15.2.77.9990
1853	Enteromorpha compressa	Liverpool	4.66537	15.2.77.9861
1863	Ectocarpus granulosus = Hincksia	New Brighton	4.65259	1974.38.583
1936	Halidrys siliquosa & small red	Birkdale	9.13688	LIV.2013.64.47
1936	Halidrys siliquosa & small red	Birkdale	6.23227	LIV.2013.64.47H
1937	Fucus ceranoides	Birkdale	2.88503	LIV2013 54-32
1938	Fucus serratus	Birkdale	4.71259	LIV.2013.64.6
1949	Fucus spiralis	Mersey	6.7	1974.38.38998
1953	Fucus serratus	New Brighton	11.2526	1974.38.38954
1953	Fucus serratus	New Brighton	14.6	1974 38-38954A
1967	Pylaiella litoralis	Seacombe	10.2641	1986.118.103
1968	Fucus vesiculosus	Otterspool	-4.1	1986.118.438
1978	Fucus vesiculosus	Eastham	30.6	1979.402.130
1978	Ceramium rubrum	New Brighton	19.7953	1979 4-02-133
1978	Ulva compressa	New Brighton	16.7442	1979 402-137
1979	Fucus vesiculosus	Speke	1.9	1986-118-462
1982	Fucus vesiculosus	Eastham	22.9586	1986 188-472
1983	Enteromorpha intestinalis	Leasow & Meols	12.6199	1982.1.3792
1990	Fucus vesiculosus	Grassendale	12.732	1990.74.139
1993	Ceramium rubrum	New Brighton	14.3294	1993.173.17
1997	Fucus Vesiculosus	Grassendale	4.9	LIV.2006.38.10
1998	Chondrus crispus	New Brighton	8.46016	Liv.2006.38.13
2001	Ulva linza	New Brighton	13.0664	LIV.2005.23.7
2002	Cladophora vagabunda	New Brighton	14.1995	LIV.2005.23.21
2005	Fucus Vesiculosus	Speke	16.5081	LIV.2005.26.4
2008	Pelvetia canaliculata	Ainsdale	8.64901	LIV.2009.30.4
2008	Polysiponia fucoidiies	New Brighton	11.7051	LIV.2009.30.3
2010	Pelvetia canaliculta	Hall Road	13.0182	LIV2010 155-5
2012	Pylaiella littoralis	New Brighton	10.9221	LIV.2012.51.16
2013	Cladophora sericea	Hall Road	14.6058	LIV.2013.51.13
2013	Pylaiella littoralis	New Brighton	9.10836	LIV.2013.51.11

## Sheet: Dock Herbaria Data
Year	Species	Location	d15Nmacroalgae ‰ (AIR)	World Museums Liverpool Acession Number
1846	Fucus vesiculosus	Princes Pier	8.21917	1974.38.38964
1981	Prasiola calophylla	Sandon Dock	13.2307	1986.118.550
1988	Cladophora vagabunda	Albert Dock	15.6455	1990.76.117
1989	Cladophora vagabunda	Queens Dock	9.19393	1990.74.141
1991	Polysiphonia urceolata	South Docks (Albert)	8.76803	1990.74.152
1993	Ceramium rubrum	Princes Dock	20.4406	1993.173.12
1999	Cladophora vagabunda	Queens Dock	8.64508	Russell 01240
2000	Polysiphonia stricta	Albert Dock	15.4271	Russel 01251
2003	Bryopsis hypnoides	Queens Dock	14.6776	LIV.2005.23.23
2004	Bryopsis hypnoides	Queens Dock	15.2245	LIV.2005.23.17
2004	Polysiphonia stricta	Queens Dock	15.1655	LIV.2005.23.9
2012	Polysiphonia stricta	Queens Dock	18.314	LIV.2012.30.5
2012	Ulva intestinalis	Salthouse Dock	13.8336	LIV.2012.51.4
2012	Polysiphonia stricta	Wapping Dock	17.3619	LIV.2012.51.16
2014	Ulva rigida	Albert Dock	12.7792	LIV.2014.56.1
2014	Ulva intestinalis	Albert Dock	9.0336	LIV.2014.33.2
2014	Ceramium diaphanum	Albert Dock	17.5084	LIV.2014.18.3
2014	Cladophora vagabunda	Collingwood Dock	10.3516	LIV.2014.45.1
2015	Cladophora vagabunda	Albert Dock	3.87652	LIV.2015.71.8
2015	Ceramium diaphanum	Albert Dock	14.1917	Liv.2015.35.1
2015	Polysiphonia stricta	Queens Dock	16.8524	LIV.2015.17.6
2015	Cladophora vagabunda	Salthouse Dock	15.8196	LIV.2015.35.2
2015	Polysiphonia stricta	Salthouse Dock	17.5832	LIV2015 27-2
2018	Polysiphonia stricta	Queens Dock	13.3802	LIV.2018.34.18

## Sheet: Modern Isotope Data
Year	Species	Location	d15Nmacroalgae ‰ (AIR)	Site Number		Year	Species	Location	d15Nmacroalgae ‰ (AIR)	Dock Name
2022	Fucus vesiculosus	River Mersey	14.5461	1		2022	Callithamnium corymbosum	South Docks	9.98083	Canning Dock (Albert)
2022	Fucus vesiculosus	River Mersey	14.7522	1		2022	Callithamnium corymbosum	South Docks	8.60549	Canning Dock (Albert)
2022	Fucus vesiculosus	River Mersey	15.781	1		2022	Cladophora	South Docks	6.30594	Canning Dock (Albert)
2022	Fucus vesiculosus	River Mersey	15.3229	1		2022	Cladophora	South Docks	5.74621	Canning Dock (Albert)
2022	Fucus vesiculosus	River Mersey	15.8447	1		2022	Cladophora	South Docks	7.17039	Canning Dock (Albert)
2022	Fucus vesiculosus	River Mersey	13.9057	1		2022	Cladophora	South Docks	7.27894	Canning Dock (Albert)
2022	Fucus vesiculosus	River Mersey	15.9413	2		2022	Cladophora	South Docks	3.59753	Clarence Graving Dock
2022	Fucus vesiculosus	River Mersey	15.0102	2		2022	Cladophora	South Docks	14.0975	Clarence Graving Dock
2022	Fucus vesiculosus	River Mersey	15.6983	2		2022	Cladophora	South Docks	8.3117	Clarence Graving Dock
2022	Fucus vesiculosus	River Mersey	13.6089	2		2022	Cladophora	South Docks	15.0599	Coburg Dock
2022	Fucus vesiculosus	River Mersey	15.8457	2		2022	Cladophora	South Docks	13.2962	Coburg Dock
2022	Fucus vesiculosus	River Mersey	16.6753	2		2022	Ulva sp.	South Docks	15.2452	Coburg Dock
2022	Fucus vesiculosus	River Mersey	18.0696	7		2022	Ulva sp.	South Docks	11.8144	Dukes Dock
2022	Fucus vesiculosus	River Mersey	19.665	7		2022	Ulva sp.	South Docks	11.9955	Dukes Dock
2022	Fucus vesiculosus	River Mersey	17.473	7		2022	Ulva sp.	South Docks	9.83742	Dukes Dock
2022	Fucus vesiculosus	River Mersey	17.6802	7		2022	Ulva sp.	South Docks	10.7606	Princes Dock
2022	Fucus vesiculosus	River Mersey	18.2857	7		2022	Ulva sp.	South Docks	8.52781	Princes Dock
2022	Fucus vesiculosus	River Mersey	17.3804	7		2022	Ulva sp.	South Docks	13.4476	Princes Dock
2022	Fucus vesiculosus	River Mersey	19.6869	7		2022	Ulva sp.	South Docks	8.84212	Queens Dock
2022	Fucus vesiculosus	River Mersey	17.1673	7		2022	Ulva sp.	South Docks	10.2438	Queens Dock
2022	Fucus vesiculosus	River Mersey	18.696	7		2022	Ulva sp.	South Docks	12.0692	Queens Dock
2022	Fucus vesiculosus	River Mersey	22.8499	15		2022	Ulva sp.	South Docks	8.369	Salthouse Dock
2022	Fucus vesiculosus	River Mersey	17.9172	15		2022	Ulva sp.	South Docks	15.8696	Salthouse Dock
2022	Fucus vesiculosus	River Mersey	19.1571	15		2022	Ulva sp.	South Docks	15.4324	Salthouse Dock
2022	Fucus vesiculosus	River Mersey	21.9347	15		2022	Ulva sp.	South Docks	12.1748	Wapping Dock
2022	Fucus vesiculosus	River Mersey	16.9502	15		2022	Ulva sp.	South Docks	10.2985	Wapping Dock
2022	Fucus vesiculosus	River Mersey	17.0677	15		2022	Ulva sp.	South Docks	11.0713	Wapping Dock
2022	Fucus vesiculosus	River Mersey	16.4353	15
2022	Fucus vesiculosus	River Mersey	15.772	16
2022	Fucus vesiculosus	River Mersey	12.8341	16
2022	Fucus vesiculosus	River Mersey	13.829	16
2022	Fucus vesiculosus	River Mersey	13.6378	16
2022	Fucus vesiculosus	River Mersey	17.5099	17
2022	Fucus vesiculosus	River Mersey	15.6983	17
2022	Fucus vesiculosus	River Mersey	17.8747	17
2022	Fucus vesiculosus	River Mersey	17.5257	17
2022	Fucus vesiculosus	River Mersey	15.3486	17
2022	Fucus vesiculosus	River Mersey	17.9459	17
2022	Fucus vesiculosus	River Mersey	15.781	18
2022	Fucus vesiculosus	River Mersey	16.2291	18
2022	Fucus vesiculosus	River Mersey	17.224	18
2022	Fucus vesiculosus	River Mersey	16.0011	18
2022	Fucus vesiculosus	River Mersey	15.056	18
2022	Fucus vesiculosus	River Mersey	15.5828	18
2022	Fucus vesiculosus	River Mersey	15.531	18
2022	Fucus vesiculosus	River Mersey	16.4616	20
2022	Fucus vesiculosus	River Mersey	17.0822	20
2022	Fucus vesiculosus	River Mersey	14.7544	20
2022	Fucus vesiculosus	River Mersey	14.6242	20
2022	Fucus vesiculosus	River Mersey	15.2275	20
2022	Ulva sp.	River Mersey	16.7447	1
2022	Ulva sp.	River Mersey	18.2997	2
2022	Ulva sp.	River Mersey	19.5722	4
2022	Ulva sp.	River Mersey	14.4664	4
2022	Ulva sp.	River Mersey	13.8171	4
2022	Ulva sp.	River Mersey	13.6876	5
2022	Ulva sp.	River Mersey	14.9922	5
2022	Ulva sp.	River Mersey	14.8219	5
2022	Ulva sp.	River Mersey	14.3797	5
2022	Ulva sp.	River Mersey	16.6634	6
2022	Ulva sp.	River Mersey	15.0659	6
2022	Ulva sp.	River Mersey	16.7022	6
2022	Ulva sp.	River Mersey	15.3029	6
2022	Ulva sp.	River Mersey	16.0636	7
2022	Ulva sp.	River Mersey	17.9301	16
2022	Ulva sp.	River Mersey	17.714	17
2022	Ulva sp.	River Mersey	17.5099	18
2022	Ulva sp.	River Mersey	7.3683	19
2022	Ulva sp.	River Mersey	7.98381	19
2022	Ulva sp.	River Mersey	7.77524	19
2022	Ulva sp.	River Mersey	18.477	20
2022	Ulva sp.	River Mersey	18.2796	20

## Sheet: Modern Site Locations
Site Number	Site Name	Latitude	Longitude
Site 1	Mersey Ferry	53.4054	-2.99802
Site 2	Coburg (Mersey)	53.3903	-2.98752
Site 3	Queens Dock	53.3927	-2.98519
Site 4	Victoria Promenade	53.3478	-2.73528
Site 5	West Bank Dockland Park	53.3493	-2.74049
Site 5A	West Bank Dockland Park (Outflow)	53.3493	-2.74049
Site 6	Hale Bank	53.3458	-2.76854
Site 7	Hale Lighthouse	53.3223	-2.79461
Site 8	Clarence Graving Dock	53.4203	-3.00051
Site 9	Princes Dock	53.4092	-2.99954
Site 10	Canning Dock	53.4016	-2.99237
Site 11	Salthouse Dock	53.4001	-2.99036
Site 12	Dukes Dock	53.3985	-2.99263
Site 13	Wapping Dock	53.396	-2.98779
Site 14	Coburg Dock	53.3909	-2.98691
Site 15	Airport 1	53.3276	-2.83487
Site 16	Airport 2	53.3269	-2.83628
Site 17	Dungeon Lane	53.3319	-2.82615
Site 18	Grassendale (South)	53.3563	-2.92122
Site 19	Grassendale Outflow	53.3571	-2.92211
Site 20	Grassendale (North)	53.3573	-2.92265

## Sheet: Dock Information
Dock	Dock Areas (m2)	Depth (m)	Volume (m3)
Albert	28510	6	171060
Canning	15833	4.5	71248.5
Canning Half Tide	9722	6	58332
Salthouse	24450	4.5	110025
Dukes	10914	4.5	49113
Wapping	22348	4.5	100566
Queens	70196	4.5	315882
Coburg	27132	4.5	122094
Brunswick	62414	4.5	280863
South Docks Total	271519		1.27918e+06
